23. Tsutsumi YM, Horikawa YT, Jennings MM, Kidd MW, Niesman IR, Yokoyama U, Head BP, Hagiwara Y, Ishikawa Y, Miyanochara A, Patel PM, Insel PA, Patel HH, Roth DM: Cardiac-specific overexpression of caveolin-3 induces endogenous cardiac protection by mimicking ischemic preconditioning. *Circulation* 2008; 118:1979–88
24. Tsutsumi YM, Kawaraguchi Y, Horikawa YT, Niesman IR, Kidd MW, Chin-Lee B, Head BP, Patel PM, Roth DM, Patel HH: Role of caveolin-3 and glucose transporter-4 in isoflurane-induced delayed cardiac protection. *ANESTHESIOLOGY* 2010; 112:1136–45
25. De Hert SG, Van der Linden PJ, Cromheecke S, Meeus R, Nelis A, Van Reeth V, ten Broecke PW, De Blier IG, Stockman BA, Rodrigus IE: Cardioprotective properties of sevoflurane in patients undergoing coronary surgery with cardiopulmonary bypass are related to the modalities of its administration. *ANESTHESIOLOGY* 2004; 101:299–310
26. Huang Z, Zhong X, Irwin MG, Ji S, Wong GT, Liu Y, Xia ZY, Finegan BA, Xia Z: Synergy of isoflurane preconditioning and propofol postconditioning reduces myocardial reperfusion injury in patients. *Clin Sci* 2011; 121:57–69

## ANESTHESIOLOGY REFLECTIONS

### Siker's Mapleson-modified Boyle Apparatus for Halothane

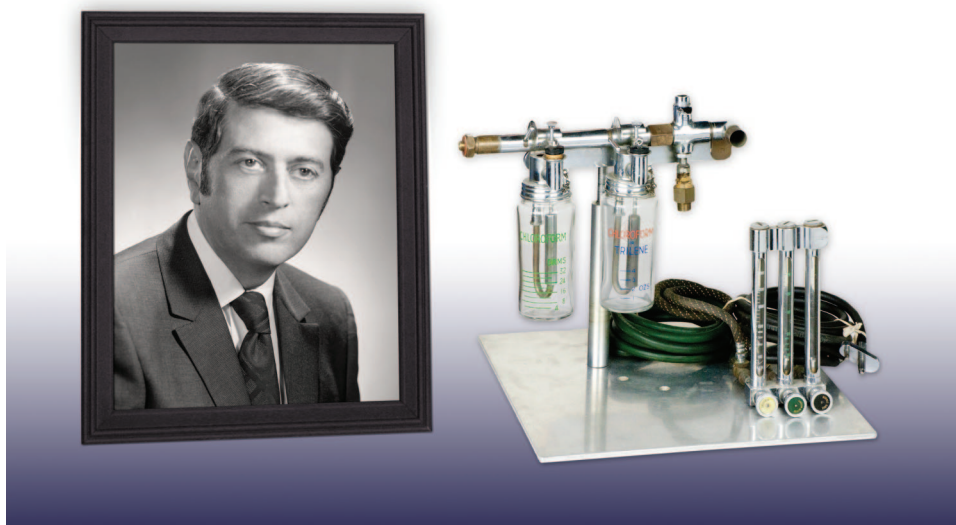

After designing his namesake mirror laryngoscope, E. S. "Rick" Siker, M.D. (b. 1926), studied in Wales from 1955–1956 with Professor W. W. Mushin. Before departing Cardiff for Pittsburgh in October of 1956, Dr. Siker (*left*) "was presented with a Boyle's anesthetic machine with a trichloroethylene vaporizer calibrated by Bill Mapleson to deliver precise concentrations of halothane." Using that apparatus (*right*), Dr. Siker conducted America's second large-scale clinical trial of halothane for general anesthesia. The 1973 American Society of Anesthesiologists (ASA) president and the recipient of ASA's 1983 Distinguished Service Award, Dr. Siker has also served as the Anesthesia Patient Safety Foundation's first executive director. He generously donated this historic Boyle Apparatus to the Wood Library-Museum of Anesthesiology. (Copyright © the American Society of Anesthesiologists, Inc. This image also appears in the *Anesthesiology Reflections* online collection available at [www.anesthesiology.org](http://www.anesthesiology.org).)

*George S. Bause, M.D., M.P.H., Honorary Curator, ASA's Wood Library-Museum of Anesthesiology, Park Ridge, Illinois, and Clinical Associate Professor, Case Western Reserve University, Cleveland, Ohio. UJYC@aol.com.*
